# Supplementary figures and images for: Synthesis and characterisation of a series of lamellar gallium and indium phosphonates and related compounds
Source: Royal Society of Chemistry journal article supplement (doi:10.1039/b000011f), 2000-01-01

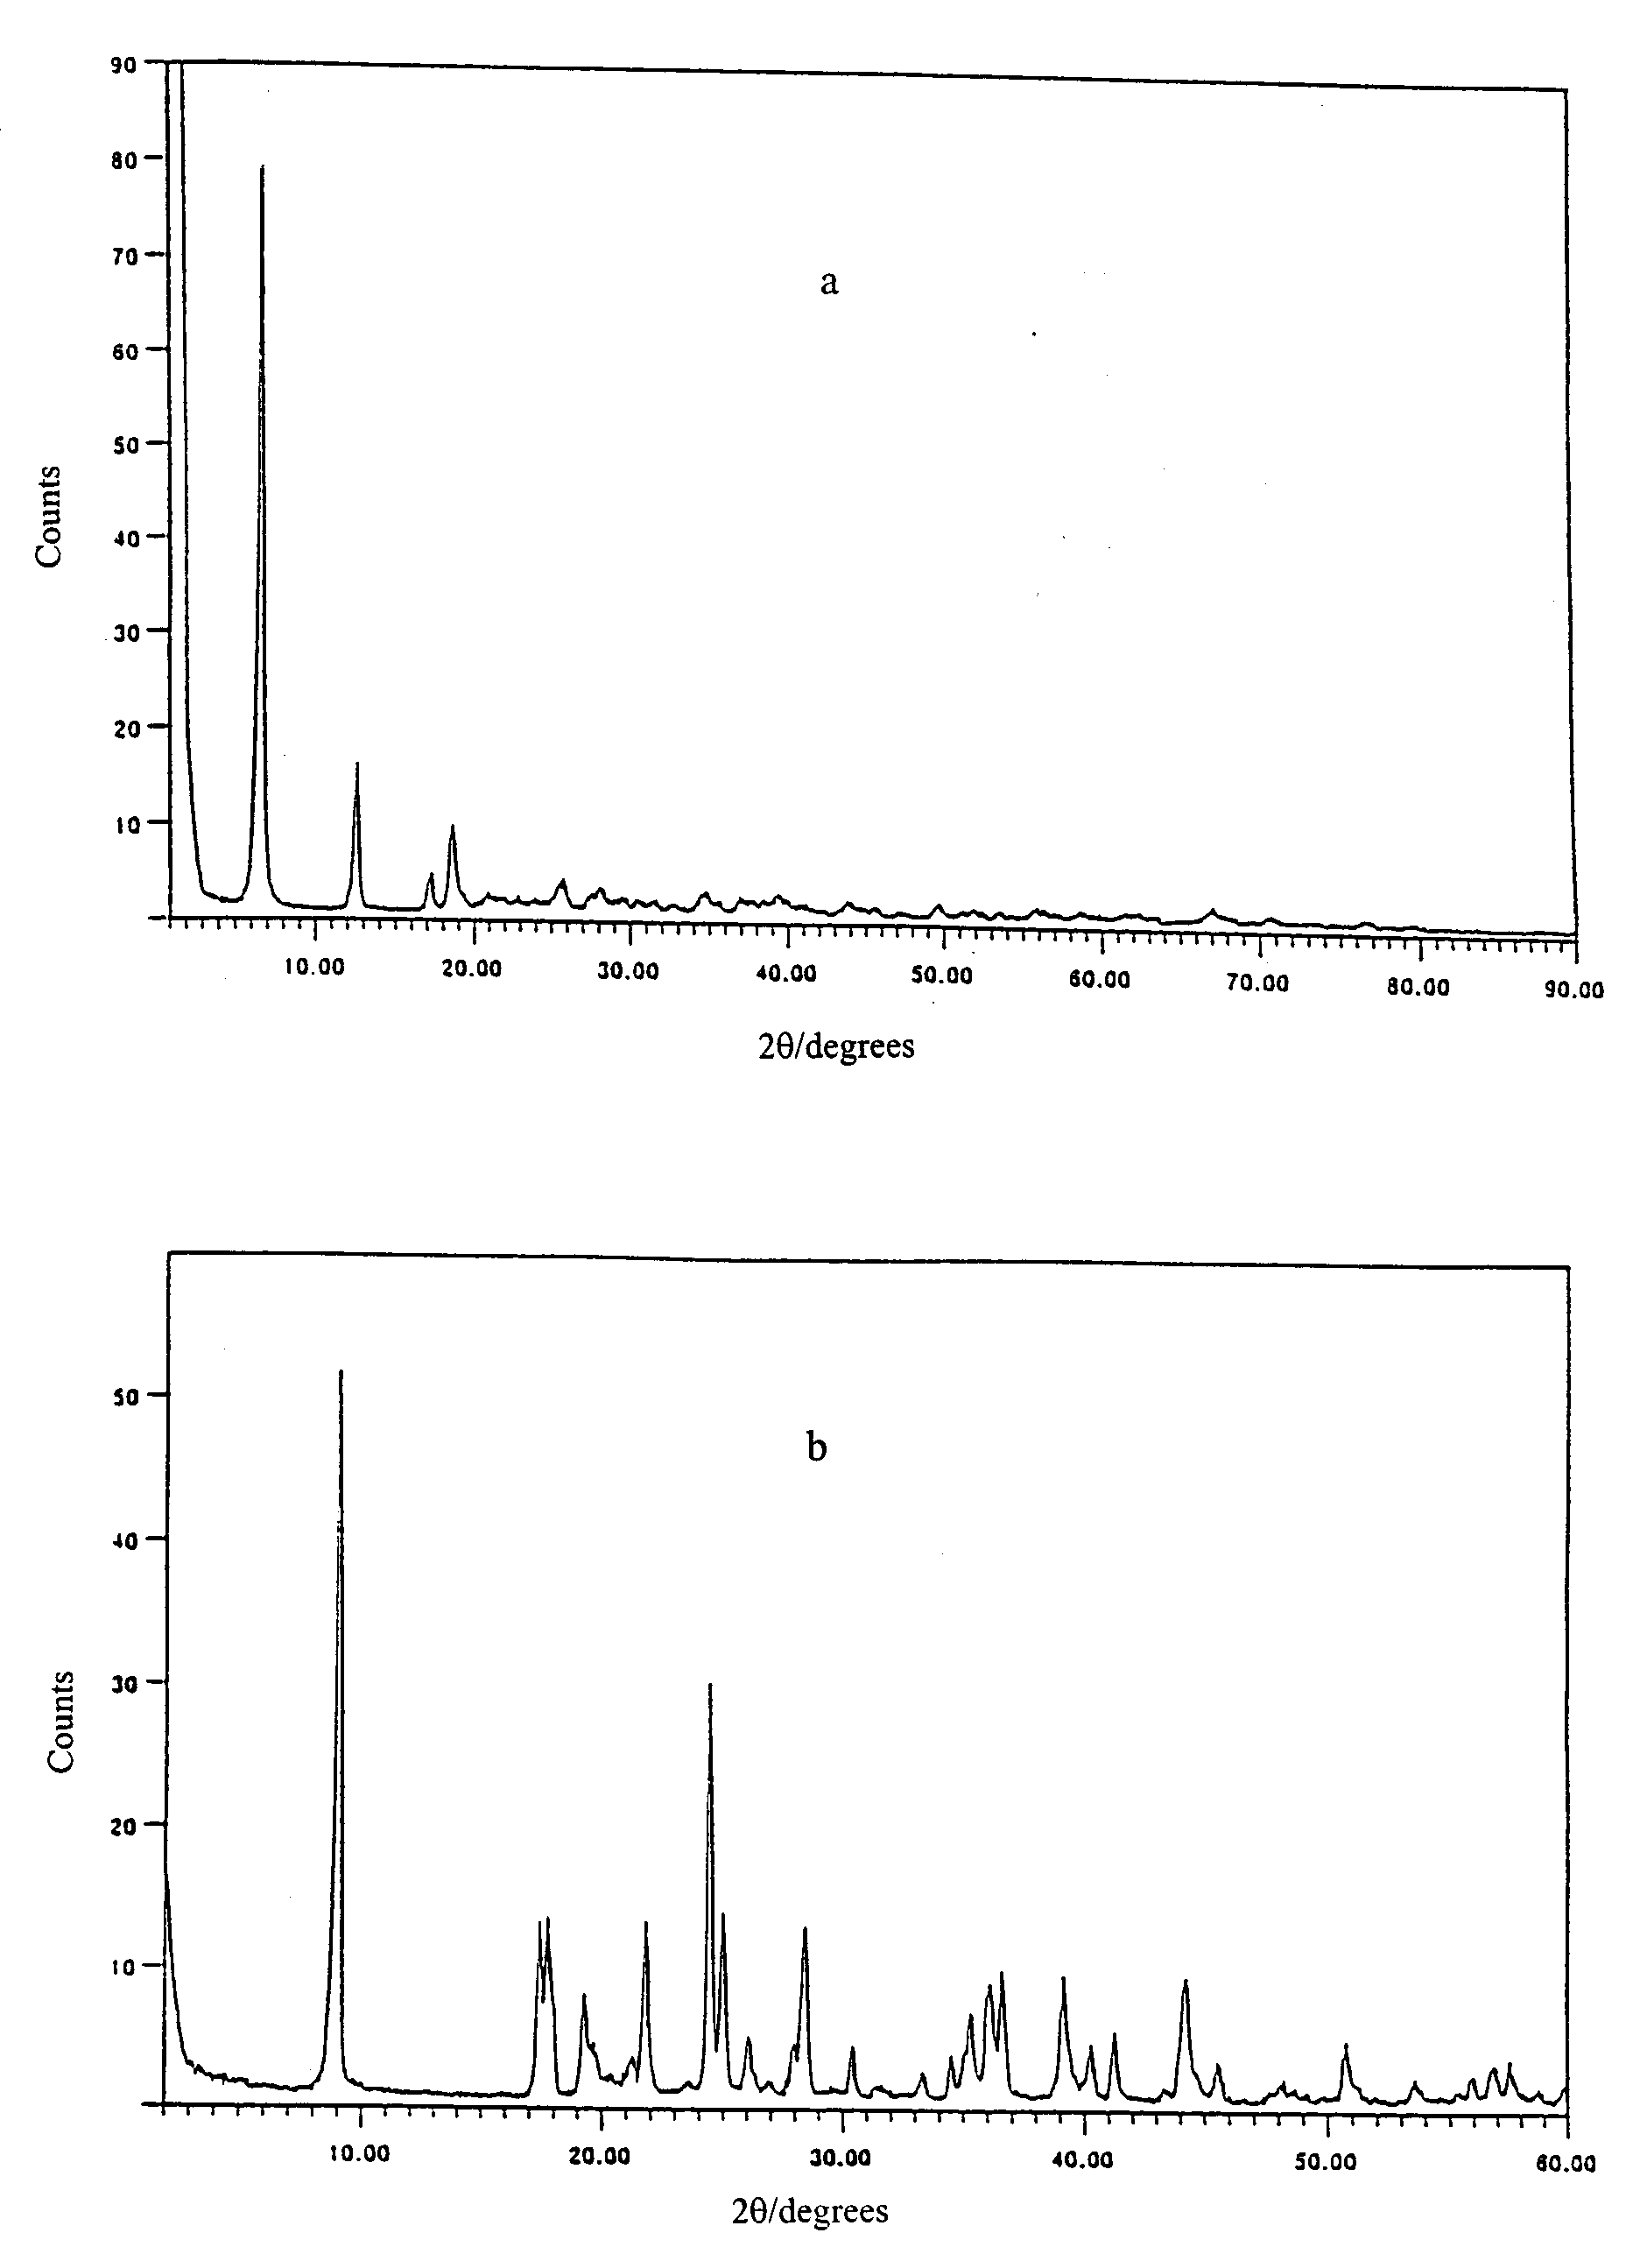

Supplement: b000011f.doc [file b000011f.doc]
